# Supplementary material
Source: PubMed Central journal article supplement (PMC2712221)
Supplement: 00011.2009_7.pdf [file 00011.2009_7.pdf]

367 **Suppl. Table 1:** *Polymorphic microsatellite markers and SNPs for the genome-wide*  
 368 *scans of the (NZOxB6)F2 population.*

| Marker    | Chr. | Pos. (Mbp) |
|-----------|------|------------|
| rs3664960 | 1    | 11.9       |
| rs3725641 | 1    | 28.8       |
| rs4222284 | 1    | 39.1       |
| rs3716368 | 1    | 49.5       |
| rs3720019 | 1    | 58.5       |
| rs3672814 | 1    | 77.2       |
| rs3664662 | 1    | 106.4      |
| rs3691057 | 1    | 125.3      |
| rs3666525 | 1    | 148.3      |
| D1Mit143  | 1    | 165.4      |
| D1Mit36   | 1    | 171.1      |
| rs3678478 | 1    | 177.6      |
| D1Mit542  | 1    | 183.3      |
| D1Mit223  | 1    | 190.5      |
| rs3715125 | 1    | 193.6      |
| rs3677975 | 2    | 20.2       |
| rs3710255 | 2    | 39.6       |
| rs3022884 | 2    | 54.4       |
| rs3699089 | 2    | 75.9       |
| rs4223268 | 2    | 93.3       |
| rs3090608 | 2    | 118.0      |
| rs3022911 | 2    | 143.8      |
| rs3693259 | 2    | 160.8      |
| rs3022949 | 3    | 14.6       |
| rs3676674 | 3    | 63.4       |
| rs3701617 | 3    | 82.2       |
| rs3712218 | 3    | 109.6      |
| rs4221957 | 3    | 129.5      |

|           |   |       |
|-----------|---|-------|
| rs3674066 | 3 | 149.3 |
| D4Mit286  | 4 | 43.2  |
| rs3698283 | 4 | 43.2  |
| rs4224587 | 4 | 89.0  |
| D4Mit175  | 4 | 100.1 |
| D4Mit203  | 4 | 129.2 |
| D4Mit233  | 4 | 144.8 |
| D5Mit72   | 5 | 21.7  |
| rs3708121 | 5 | 28.0  |
| D5Mit77   | 5 | 38.9  |
| D5Mit254  | 5 | 55.6  |
| D5Mit290  | 5 | 64.8  |
| rs3690045 | 5 | 89.7  |
| D5Mit259  | 5 | 89.7  |
| D5Mit161  | 5 | 127.4 |
| D5Mit223  | 5 | 147.7 |
| rs3023064 | 6 | 17.7  |
| rs3699842 | 6 | 32.8  |
| rs3717270 | 6 | 55.7  |
| rs3686308 | 6 | 76.2  |
| rs3667765 | 6 | 94.3  |
| rs3711196 | 6 | 114.2 |
| rs3684061 | 6 | 135.6 |
| rs3655750 | 7 | 20.5  |
| rs3720603 | 7 | 58.7  |
| rs3710266 | 7 | 75.7  |
| rs3714986 | 7 | 94.5  |
| rs3692423 | 7 | 111.7 |
| rs3697227 | 7 | 134.8 |
| rs3686775 | 8 | 16.8  |
| rs3726395 | 8 | 36.2  |
| rs3703673 | 8 | 61.2  |

|           |    |       |
|-----------|----|-------|
| rs3696502 | 8  | 78.2  |
| rs3710112 | 8  | 100.8 |
| rs4227443 | 8  | 126.4 |
| rs3663821 | 9  | 17.6  |
| rs3707146 | 9  | 36.8  |
| rs3666398 | 9  | 56.4  |
| rs3685573 | 9  | 76.1  |
| rs3692530 | 9  | 98.2  |
| rs3663269 | 10 | 10.0  |
| rs3679593 | 10 | 26.8  |
| rs3696307 | 10 | 53.5  |
| rs3717445 | 10 | 82.5  |
| rs3716716 | 10 | 102.5 |
| rs3151132 | 10 | 118.0 |
| rs3703198 | 11 | 14.9  |
| rs3723833 | 11 | 33.0  |
| rs3088940 | 11 | 56.3  |
| rs3691128 | 11 | 74.5  |
| rs3688569 | 11 | 88.3  |
| rs3705163 | 11 | 106.8 |
| rs3709592 | 12 | 15.1  |
| rs3665526 | 12 | 41.1  |
| rs3706319 | 12 | 59.1  |
| rs3655558 | 12 | 75.8  |
| rs3711162 | 12 | 90.4  |
| rs3023940 | 12 | 111.2 |
| rs3681143 | 13 | 11.9  |
| rs3723893 | 13 | 34.3  |
| rs3023382 | 13 | 44.5  |
| rs3714056 | 13 | 69.0  |
| rs3666540 | 13 | 87.8  |
| rs3686453 | 13 | 109.2 |

|           |    |       |
|-----------|----|-------|
| rs3660288 | 14 | 21.2  |
| rs3696080 | 14 | 46.2  |
| rs3700249 | 14 | 66.8  |
| rs3676913 | 14 | 88.5  |
| rs3686670 | 14 | 102.3 |
| rs4137670 | 15 | 4.1   |
| rs3690031 | 15 | 22.1  |
| rs3090057 | 15 | 41.6  |
| rs3702158 | 15 | 57.0  |
| rs4230816 | 15 | 75.0  |
| rs3707104 | 15 | 92.1  |
| rs4155455 | 16 | 6.6   |
| rs4165467 | 16 | 25.4  |
| rs4180179 | 16 | 45.0  |
| rs4197785 | 16 | 67.6  |
| rs4216475 | 16 | 89.5  |
| rs3660203 | 17 | 7.3   |
| rs4137889 | 17 | 25.3  |
| rs3677240 | 17 | 44.3  |
| rs3718630 | 17 | 66.8  |
| rs3669120 | 17 | 86.6  |
| rs4231742 | 18 | 11.1  |
| rs3666799 | 18 | 32.0  |
| rs3706369 | 18 | 52.7  |
| rs3675825 | 18 | 70.9  |
| rs3715760 | 18 | 87.6  |
| rs3691881 | 19 | 18.7  |
| rs3705022 | 19 | 36.5  |
| rs3720557 | 19 | 53.1  |

370 **Suppl. Table 2:** *Thresholds of suggestive ( $p < 0.63$ ) and significant linkage ( $p < 0.05$  and*  
 371  *$p < 0.01$ ) in (NZOxB6)F2 genome-wide scans determined by 1,000 permutations (Fig.*  
 372 *1 and Table 2).*

|            | BW  | BF  | LM  | BG  | BL  | BMI | Chol | TG  |
|------------|-----|-----|-----|-----|-----|-----|------|-----|
| $p < 0.63$ | 2.1 | 2.0 | 2.1 | 2.0 | 2.1 | 2.1 | 2.1  | 2.1 |
| $p < 0.05$ | 3.4 | 3.5 | 3.4 | 3.4 | 3.4 | 3.5 | 3.4  | 3.4 |
| $p < 0.01$ | 4.1 | 4.1 | 4.2 | 4.2 | 4.1 | 4.3 | 4.3  | 4.1 |

373

374 **Suppl. Table 3:** *Microsatellite markers and SNPs used for genotyping of the*  
 375 *founders for the congenic lines B6.NZO-Nob3.91 (Supplementary Fig. S2 and S3)*  
 376 *and B6.NZO-Nob3.38 (Fig.3).*

| Marker    | Chr. | Pos. [Mbp] |
|-----------|------|------------|
| D1Mit231  | 1    | 20.9       |
| D1Mit232  | 1    | 40.3       |
| D1Mit303  | 1    | 63.0       |
| D1Mit49   | 1    | 89.1       |
| D1Mit468  | 1    | 105.9      |
| D1Mit471  | 1    | 124.1      |
| D1Mit102  | 1    | 149.1      |
| D1Mit36   | 1    | 171.1      |
| D1Mit209  | 1    | 193.3      |
| D2Mit312  | 2    | 3.2        |
| D2Mit362  | 2    | 18.9       |
| D2Mit297  | 2    | 42.5       |
| D2Mit182  | 2    | 68.7       |
| D2Mit272  | 2    | 90.4       |
| D2Mit274  | 2    | 114.3      |
| D2Mit136  | 2    | 136.2      |
| rs8273702 | 2    | 158.0      |
| D2Mit310  | 2    | 162.0      |
| D2Mit266  | 2    | 181.6      |
| D3Mit264  | 3    | 8.7        |
| D3Mit151  | 3    | 31.1       |
| D3Mit25   | 3    | 56.6       |
| D3Mit230  | 3    | 82.4       |
| D3Mit142  | 3    | 118.1      |
| D3Mit84   | 3    | 143.4      |
| D4Mit149  | 4    | 3.6        |
| D4Mit135  | 4    | 19.8       |

|          |   |       |
|----------|---|-------|
| D4Mit107 | 4 | 37.1  |
| D4Mit217 | 4 | 59.8  |
| D4Mit114 | 4 | 79.6  |
| D4Mit303 | 4 | 97.9  |
| D4Mit57  | 4 | 117.8 |
| D4Mit233 | 4 | 144.8 |
| D5Mit72  | 5 | 21.7  |
| D5Mit77  | 5 | 38.9  |
| D5Mit254 | 5 | 55.6  |
| D5Mit58  | 5 | 73.7  |
| D5Mit259 | 5 | 89.7  |
| D5Mit239 | 5 | 107.8 |
| D5Mit161 | 5 | 127.4 |
| D5Mit380 | 5 | 141.6 |
| D6Mit86  | 6 | 4.4   |
| D6Mit116 | 6 | 25.1  |
| D6Mit349 | 6 | 46.1  |
| D6Mit123 | 6 | 69.7  |
| D6Mit230 | 6 | 98.5  |
| D6Mit150 | 6 | 116.1 |
| D6Mit291 | 6 | 137.4 |
| D7Mit21  | 7 | 3.3   |
| D7Mit77  | 7 | 28.4  |
| D7Mit145 | 7 | 58.7  |
| D7Mit250 | 7 | 86.5  |
| D7Mit138 | 7 | 108.5 |
| D7Mit238 | 7 | 126.2 |
| D7Mit361 | 7 | 144.6 |
| D8Mit155 | 8 | 5.0   |
| D8Mit289 | 8 | 29.9  |
| D8Mit100 | 8 | 59.1  |
| D8Mit179 | 8 | 73.5  |

|            |    |       |
|------------|----|-------|
| D8Mit268   | 8  | 90.8  |
| D8Mit183   | 8  | 103.6 |
| D8Mit13    | 8  | 126.3 |
| D9Mit64    | 9  | 28.4  |
| D9Mit97    | 9  | 50.5  |
| D9Mit107   | 9  | 73.3  |
| D9Mit198   | 9  | 91.2  |
| D9Mit179   | 9  | 112.1 |
| D10Mit123  | 10 | 10.0  |
| rs13480579 | 10 | 35.9  |
| D10Mit31   | 10 | 67.7  |
| D10Mit117  | 10 | 87.0  |
| D10Mit233  | 10 | 113.8 |
| D11Mit270  | 11 | 44.6  |
| D11Mit131  | 11 | 56.0  |
| D11Mit242  | 11 | 63.2  |
| D11Mit212  | 11 | 88.7  |
| D11Mit12   | 11 | 113.0 |
| D12Mit11   | 12 | 19.8  |
| D12Mit109  | 12 | 43.1  |
| D12Mit36   | 12 | 61.8  |
| D12Mit158  | 12 | 83.7  |
| D12Mit28   | 12 | 106.6 |
| D13Mit158  | 13 | 4.9   |
| rs13481734 | 13 | 27.1  |
| D13Mit139  | 13 | 51.9  |
| D13Mit159  | 13 | 93.0  |
| D13Mit31   | 13 | 115.0 |
| D14Mit11   | 14 | 12.9  |
| D14Mit44   | 14 | 29.1  |
| D14Mit233  | 14 | 52.8  |
| D14Mit193  | 14 | 71.9  |



|            |    |       |
|------------|----|-------|
| D14Mit7    | 14 | 90.8  |
| D15Mit179  | 15 | 13.4  |
| D15Mit85   | 15 | 40.1  |
| D15Mit167  | 15 | 59.8  |
| D15Mit261  | 15 | 80.1  |
| D15Mit97   | 15 | 100.6 |
| rs4156937  | 16 | 7.1   |
| D16Mit171  | 16 | 56.3  |
| D16Mit77   | 16 | 60.9  |
| D16Mit71   | 16 | 97.1  |
| D17Mit164  | 17 | 3.9   |
| D17Mit173  | 17 | 26.4  |
| D17Mit177  | 17 | 48.7  |
| D17Mit185  | 17 | 68.8  |
| D17Mit123  | 17 | 93.6  |
| D18Mit221  | 18 | 10.0  |
| rs6167189  | 18 | 25.0  |
| D18Mit177  | 18 | 41.1  |
| D18Mit152  | 18 | 62.1  |
| D18Mit4    | 18 | 84.3  |
| rs13483542 | 19 | 16.2  |
| D19Mit65   | 19 | 39.0  |
| D19Mit71   | 19 | 59.7  |

377
