# Supplementary material
Source: PubMed Central journal article supplement (PMC2712221)

Suppl. Fig. 1

**A**

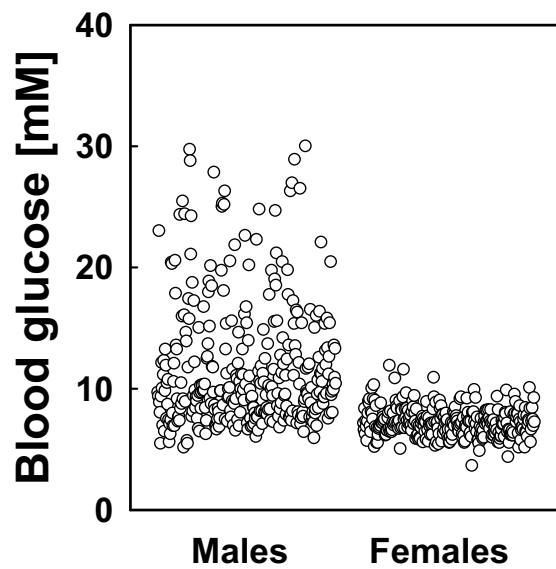

**B**

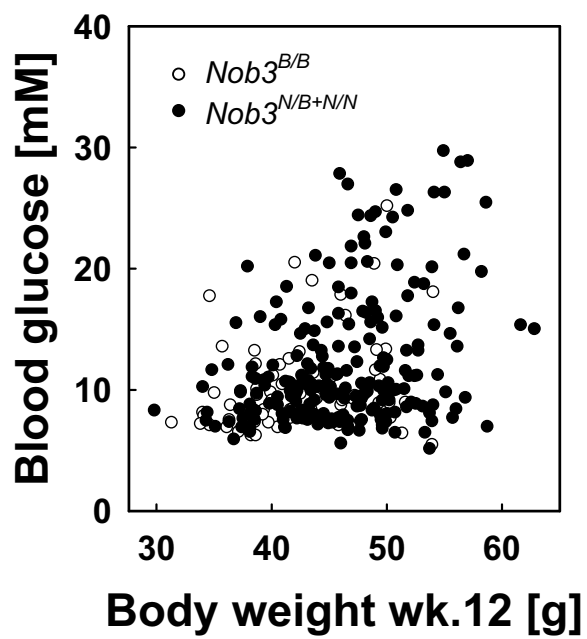

Supplement: 00011.2009_1.pdf [file 00011.2009_1.pdf]

Suppl. Fig. 2

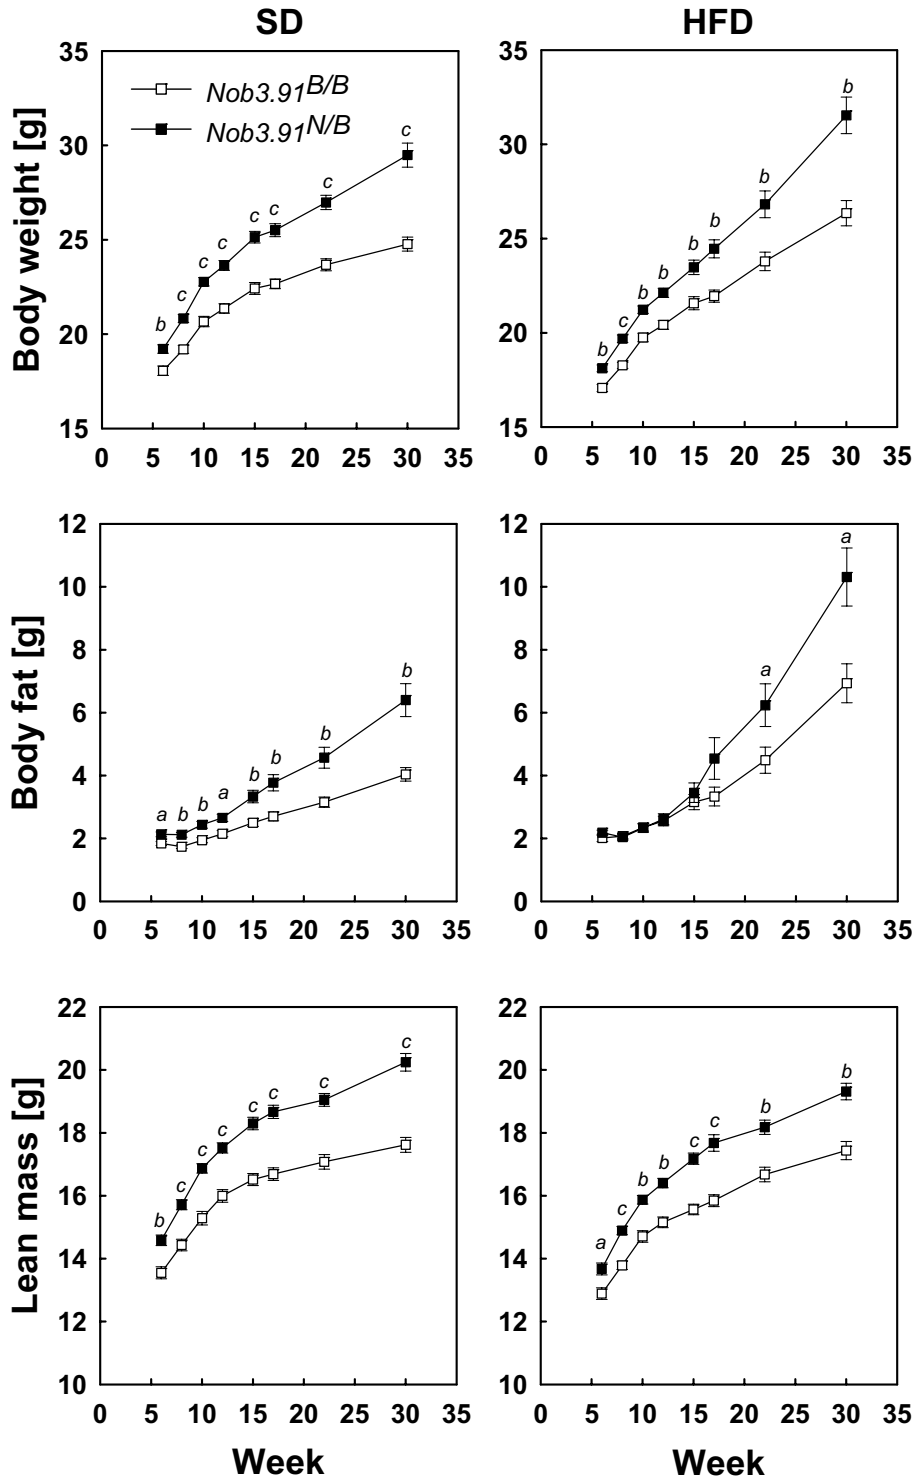

Supplement: 00011.2009_2.pdf [file 00011.2009_2.pdf]

Suppl. Fig. 3

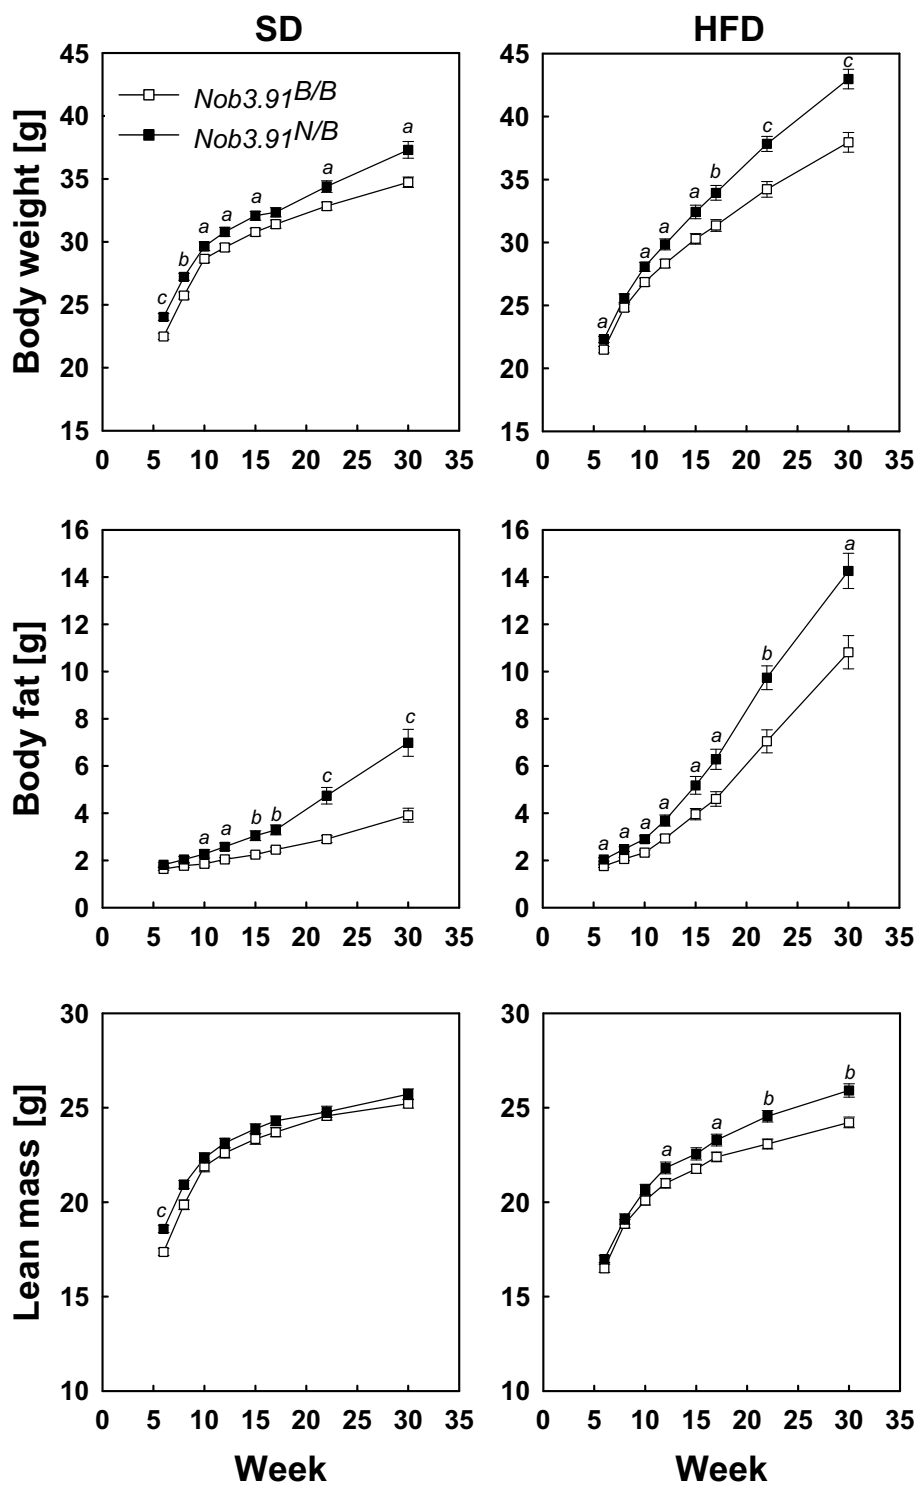

Supplement: 00011.2009_3.pdf [file 00011.2009_3.pdf]

Suppl. Fig. 4

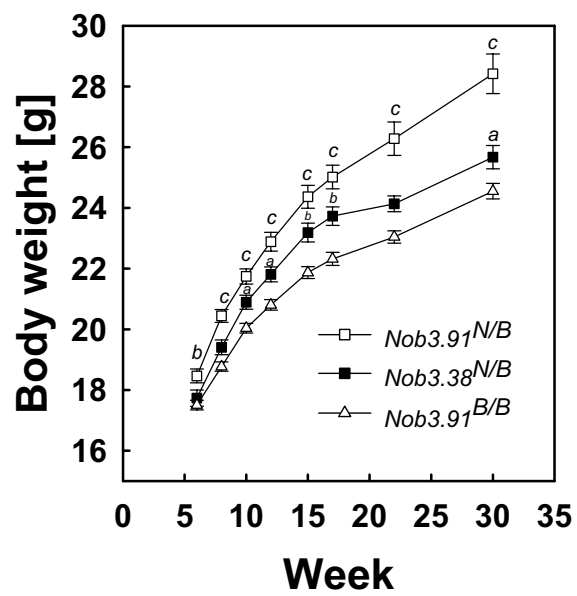

Supplement: 00011.2009_4.pdf [file 00011.2009_4.pdf]

Suppl. Fig. 5

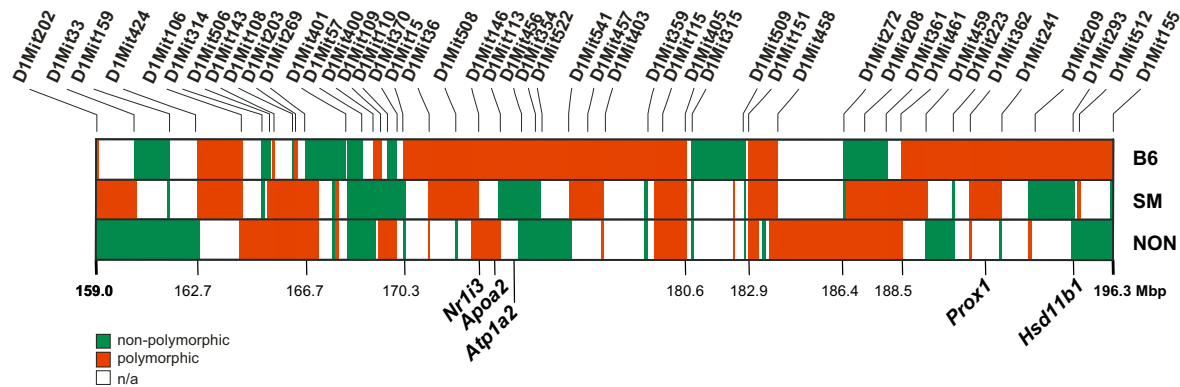

Supplement: 00011.2009_5.pdf [file 00011.2009_5.pdf]
